# Supplementary material for: Effectiveness and Ethical Evaluation of Nudging to Promote the Self-Management in Diabetes Mellitus Type 2
Source: PubMed Central journal article supplement — Gesundheitswesen. 2022 Jun 23;84(11):1059–66. [Article in German] doi: 10.1055/a-1709-0591 (PMC9671667; doi:10.1055/a-1709-0591), 2022-06-23
Supplement: 10-1055-a-1709-0591-2020-12-1317.pdf [file 10-1055-a-1709-0591-2020-12-1317.pdf]

## Zusatzmaterial

| Nudge-Kategorie                                               | Operationalisierung                                                                                                    | Hinweise zur Wirksamkeit                                                                                                                                                                                                                                                                          | Ethische Aspekte                                                                                                                                                                                                                                                                                                  |
|---------------------------------------------------------------|------------------------------------------------------------------------------------------------------------------------|---------------------------------------------------------------------------------------------------------------------------------------------------------------------------------------------------------------------------------------------------------------------------------------------------|-------------------------------------------------------------------------------------------------------------------------------------------------------------------------------------------------------------------------------------------------------------------------------------------------------------------|
| <b>1. Aufnahme in das DMP</b>                                 |                                                                                                                        |                                                                                                                                                                                                                                                                                                   |                                                                                                                                                                                                                                                                                                                   |
| <b>Widerspruchsregelung</b>                                   | Automatische und evtl. verpflichtende und sanktionierte Einschreibung zur Ersts Schulung inkl. Terminvergabe (opt-out) | (?) Bisher nur teilweise positive Evidenz in anderen Kontexten <ul style="list-style-type: none"> <li>bspw. für die Wirksamkeit von Widerspruchsregelungen bei Terminen bei Grippeimpfungen</li> </ul>                                                                                            | (!) Relevanter Eingriff in die Handlungsfreiheit in Verbindung mit Sanktionen.<br>Ethische Voraussetzungen: <ul style="list-style-type: none"> <li>Explizite Aufklärung der Patienten vor der Einschreibung in das DMP</li> <li>Einfache Verschiebung des Termins (Telefon, Email, persönlich) möglich</li> </ul> |
| <b>Soziale Unterstützung</b>                                  | Einbindung der Partner in Ersts Schulung                                                                               | (+/-) Teilweise positive Evidenz bei Patienten mit Diabetes mellitus<br>Die Einbindung des Partners kann unter bestimmten Voraussetzungen (wie bspw. übereinstimmenden Erwartungen) zu signifikanten Verbesserungen des Selbstmanagements führen                                                  | (!) Relevanter Eingriff in die Privatsphäre. Nicht für jede Partnerschaft geeignet<br>Ethische Voraussetzungen: <ul style="list-style-type: none"> <li>nur bei doppeltem Opt-in nach gründlicher Aufklärung</li> <li>Schulung des Partners für seine Rolle</li> </ul>                                             |
| <b>2. Anfängliche Initiative zur Kontrolle der Erkrankung</b> |                                                                                                                        |                                                                                                                                                                                                                                                                                                   |                                                                                                                                                                                                                                                                                                                   |
| <b>Soziale Unterstützung</b>                                  | Einbindung der Partner in Sprechstunden                                                                                | (+/-) Teilweise positive Evidenz bei Patienten mit Diabetes mellitus <ul style="list-style-type: none"> <li>Partnereinbindung kann unter bestimmten Voraussetzungen (wie bspw. übereinstimmenden Erwartungen der Partner) zu signifikanten Verbesserungen des Selbstmanagements führen</li> </ul> | (!) Relevanter Eingriff in die Privatsphäre. Nicht für jede Partnerschaft geeignet<br>Ethische Voraussetzungen: <ul style="list-style-type: none"> <li>nur bei doppeltem Opt-in nach gründlicher Aufklärung</li> <li>Schulung des Partners für seine Rolle</li> </ul>                                             |
| <b>Soziale Unterstützung</b>                                  | Sammeltermine beim Arzt mit anderen Patienten                                                                          | (+) Überwiegend positive Evidenz bei Patienten mit Diabetes mellitus<br>Es bedarf weiterer Untersuchungen, um zu verstehen, für welche Patienten Sammeltermine besonders geeignet sind und wie diese ausgestaltet werden sollten                                                                  | (+) Instrument mit mäßiger Eingriffstiefe in die Privatsphäre und hohem Potenzial zur Förderung der Motivation und Disziplin.<br><u>Ethische Voraussetzungen:</u> <ul style="list-style-type: none"> <li>Opt-in</li> <li>Beachtung des Datenschutzes</li> </ul>                                                   |

| Nudge-Kategorie                     | Operationalisierung                                                                          | Hinweise zur Wirksamkeit                                                                                                                                                                                                                                                                                 | Ethische Aspekte                                                                                                                                                                                                                                                                                                                                                                                                                                                                                                                                                                                                                |
|-------------------------------------|----------------------------------------------------------------------------------------------|----------------------------------------------------------------------------------------------------------------------------------------------------------------------------------------------------------------------------------------------------------------------------------------------------------|---------------------------------------------------------------------------------------------------------------------------------------------------------------------------------------------------------------------------------------------------------------------------------------------------------------------------------------------------------------------------------------------------------------------------------------------------------------------------------------------------------------------------------------------------------------------------------------------------------------------------------|
| <b>3. Kontinuierliche Kontrolle</b> |                                                                                              |                                                                                                                                                                                                                                                                                                          |                                                                                                                                                                                                                                                                                                                                                                                                                                                                                                                                                                                                                                 |
| <b>Soziale Normen</b>               | Mitteilungen über mehrheitliches Verhalten oder mehrheitliche Meinungen.                     | (?) Limitierte Evidenz<br>Die Wirksamkeit wurde bisher nur in anderen Kontexten wie der Reduzierung des Energieverbrauchs oder der Zahlung von Einkommenssteuern nachgewiesen                                                                                                                            | (!) Gefahr tendenziöser Normsetzungen, Stigmatisierungen und Beeinträchtigungen des psychischen Wohlergehens von Patienten<br><u>Ethische Voraussetzungen:</u> <ul style="list-style-type: none"> <li>• unverzerrte Darstellung der Sachlage</li> <li>• nur Opt-in</li> <li>• Vermeidung bloßer Versagensvorwürfe</li> <li>• nur in Verbindung mit konstruktiven Vorschlägen zur Verbesserung des Patientenmanagements</li> </ul>                                                                                                                                                                                               |
| <b>Feedback</b>                     | Schriftliche oder mündliche Berichte über den individuellen Behandlungszustand der Patienten | (+) Überwiegend positive Evidenz zur Verbesserung des Selbstmanagements bei Patienten mit chronischen Erkrankungen <ul style="list-style-type: none"> <li>• Es bedarf weiterer Untersuchungen im Diabeteskontext und zur Wirksamkeit unterschiedlicher Feedback-Mechanismen und -Häufigkeiten</li> </ul> | (+) Hohes Nutzenpotenzial als Informationsquelle und zur Verhaltenssteuerung, das als Standard in DMPs eingesetzt werden sollte. Geringer Eingriff in Persönlichkeitsrechte. Gefahr der Entmutigung.<br><u>Ethische Voraussetzungen:</u> <ul style="list-style-type: none"> <li>• Sofern soziale Nudges in den Berichten enthalten sind, gelten die entsprechenden Kautelen (s.o.)</li> <li>• Wahrheitsgetreue, nicht-stigmatisierende und konstruktive Darstellung der Berichte</li> <li>• Einfaches Opt-out für die Patienten</li> <li>• Nach Möglichkeit Besprechung schriftlicher Feedback-Berichte mit dem Arzt</li> </ul> |
| <b>Erinnerungen</b>                 | Ärztliche Erinnerungsschreiben/Anrufe für Teilnahme an Kontrolluntersuchungen                | (+) Überwiegend positive Evidenz zur Verbesserung des Terminmanagements bei Patienten mit Diabetes mellitus                                                                                                                                                                                              | (+) Hohes Nutzenpotenzial für das Management von Terminen und Aufgaben mit nur geringem Schadenspotenzial v.a. als Belästigung. Ihr Einsatz als Standard in DMPs wird empfohlen.                                                                                                                                                                                                                                                                                                                                                                                                                                                |

| <b>Nudge-Kategorie</b>       | <b>Operationalisierung</b>                                 | <b>Hinweise zur Wirksamkeit</b>                                                                                                                                                                                                                                                                                                                                  | <b>Ethische Aspekte</b>                                                                                                                                                                                                                                                                                                                                            |
|------------------------------|------------------------------------------------------------|------------------------------------------------------------------------------------------------------------------------------------------------------------------------------------------------------------------------------------------------------------------------------------------------------------------------------------------------------------------|--------------------------------------------------------------------------------------------------------------------------------------------------------------------------------------------------------------------------------------------------------------------------------------------------------------------------------------------------------------------|
|                              | SMS/E-Mails mit konkreten erreichbaren Tageszielen         | (+) Überwiegend positive Evidenz zur Verbesserung von Ernährung oder physischer Aktivität bei Patienten mit Diabetes mellitus <ul style="list-style-type: none"> <li>• Es bedarf weiterer Studien zur Ausgestaltung und Häufigkeit von Erinnerungen</li> <li>• Effekte auf die Verbesserung des HbA1c-Wertes konnten bisher nicht nachgewiesen werden</li> </ul> | Ethische Voraussetzungen: <ul style="list-style-type: none"> <li>• Wahl einer möglichst unaufdringlichen Form von Erinnerungen</li> <li>• Möglichkeit eines einfachen Opt-out.</li> </ul>                                                                                                                                                                          |
| <b>Schockbilder</b>          | Bilder von schwerwiegenden Folgen der Diabetes-Erkrankung. | (?) Bisher nur Evidenz im Kontext der Primärprävention <ul style="list-style-type: none"> <li>• Fehlende Evidenz zur Wirksamkeit und zu potentiell negativen Auswirkungen bei Patienten mit chronischen Erkrankungen</li> </ul>                                                                                                                                  | (-) Gefahr psychischer Belastungen (insb. Ängste) und Belästigungen, die Abwehrreaktionen und negative Auswirkungen auf das Selbstmanagement bewirken können.                                                                                                                                                                                                      |
| <b>Verhaltensverträge</b>    | Verhaltensverträge zur Reduktion von Körpergewicht         | (+) Überwiegend positive Evidenz zur Reduktion von Körpergewicht bei übergewichtigen Personen<br>Es bedarf weiterer Studien bei Patienten mit Diabetes mellitus                                                                                                                                                                                                  | (+) Gute Möglichkeit zur freiwilligen Stärkung der Selbstverpflichtung von Patienten in Abhängigkeit von ihrer Persönlichkeit. Geringer Eingriff in die Persönlichkeitsrechte bei strikt freiwilliger Teilnahme.<br><u>Ethische Voraussetzungen:</u> <ul style="list-style-type: none"> <li>• nur als Opt-in</li> <li>• nur nach ausführlicher Beratung</li> </ul> |
|                              | Verhaltensverträge zur Verbesserung des HbA1c-Wertes       | (?) Bisher nur limitierte Evidenz zur Verbesserung des HbA1c-Wertes bei Patienten mit Diabetes mellitus                                                                                                                                                                                                                                                          |                                                                                                                                                                                                                                                                                                                                                                    |
| <b>Soziale Unterstützung</b> | Sammeltermine beim Arzt mit anderen Patienten.             | (+) Überwiegend positive Evidenz bei Patienten mit Diabetes mellitus <ul style="list-style-type: none"> <li>• Es bedarf weiterer Untersuchungen, um zu verstehen, für welche Patienten Sammeltermine geeignet sind und wie diese ausgestaltet werden sollten</li> </ul>                                                                                          | (+) Instrument mit mäßiger Eingriffstiefe in die Privatsphäre und hohem Potenzial zur Förderung der Motivation und Disziplin<br>Ethische Voraussetzungen: <ul style="list-style-type: none"> <li>• Opt-in</li> <li>• Beachtung des Datenschutzes</li> </ul>                                                                                                        |

| Nudge-Kategorie                                                                                  | Operationalisierung                                                                                                   | Hinweise zur Wirksamkeit                                                                                                                                                                                                                                                                             | Ethische Aspekte                                                                                                                                                                                                                                                                                                                                                                                                                                                |
|--------------------------------------------------------------------------------------------------|-----------------------------------------------------------------------------------------------------------------------|------------------------------------------------------------------------------------------------------------------------------------------------------------------------------------------------------------------------------------------------------------------------------------------------------|-----------------------------------------------------------------------------------------------------------------------------------------------------------------------------------------------------------------------------------------------------------------------------------------------------------------------------------------------------------------------------------------------------------------------------------------------------------------|
| 4. Bei auftretenden Komplikationen im Selbstmanagement (bspw. Verschlechterung des HbA1c-Wertes) |                                                                                                                       |                                                                                                                                                                                                                                                                                                      |                                                                                                                                                                                                                                                                                                                                                                                                                                                                 |
| <b>Widerspruchsregelungen</b>                                                                    | Automatische und evtl. verpflichtende und sanktionierte Einschreibung für Nachschulung inkl. Terminvergabe            | (?) Bisher nur teilweise positive Evidenz in anderen Kontexten <ul style="list-style-type: none"> <li>bspw. für die Wirksamkeit von Widerspruchsregelungen bei der Terminvergabe für Grippeimpfungen</li> </ul>                                                                                      | (!) Relevanter Eingriff in die Handlungsfreiheit in Verbindung mit Sanktionen<br>Ethische Voraussetzungen: <ul style="list-style-type: none"> <li>Explizite Aufklärung der Patienten vor der Einschreibung in das DMP</li> <li>Einfache Verschiebung des Termins (Telefon, Email, persönlich) möglich</li> </ul>                                                                                                                                                |
| <b>Zielvereinbarungen mit konkreten Umsetzungsplänen</b>                                         | Individuelle Zielsetzungsgespräche mit Arzt/Coach inkl. konkreter Umsetzungspläne im Alltag                           | (+) Überwiegend positive Evidenz bei Patienten mit Diabetes mellitus<br>Es bedarf weiterer Untersuchungen um zu verstehen, wie die Vereinbarungen und Umsetzungspläne genau ausgestaltet werden sollten                                                                                              | (+) Gute Möglichkeit zur Stärkung der Eigenverantwortung und Motivation von Patienten. Kann trotz signifikanten Eingriffs in die Handlungsfreiheit als Pflichtbestandteil von DMPs gerechtfertigt werden.<br><br><u>Ethische Voraussetzungen:</u> <ul style="list-style-type: none"> <li>Der Patient darf über das Ziel mitbestimmen</li> <li>Die Ziele sind realistisch</li> <li>Die Zielerreichung hängt wesentlich vom Verhalten des Patienten ab</li> </ul> |
| <b>Peer Mentoring</b>                                                                            | Patienten-Patienten-Gespräche insbes. zwischen Patienten mit erfolgreichem und weniger erfolgreichem Selbstmanagement | (+/-) Teilweise positive Evidenz für Peer-Mentoring bei Patienten mit Diabetes mellitus <ul style="list-style-type: none"> <li>Es bedarf weiterer Untersuchungen um zu verstehen, ob und wenn ja für welche Patienten Peer Mentoring geeignet ist und wie dies ausgestaltet werden sollte</li> </ul> | (+) Ergänzende Förderungsmaßnahme mit einem Nutzenpotenzial zur Förderung der Motivation der Patienten. Bei strikter Freiwilligkeit weitgehend unproblematisch, tangiert die Privatsphäre.<br><u>Ethische Voraussetzungen:</u> <ul style="list-style-type: none"> <li>Nur als Opt-in</li> </ul>                                                                                                                                                                 |

| <b>Nudge-Kategorie</b>       | <b>Operationalisierung</b>                      | <b>Hinweise zur Wirksamkeit</b>                                                                                                                                                                                                                                                                 | <b>Ethische Aspekte</b>                                                                                                                                                                                                                                               |
|------------------------------|-------------------------------------------------|-------------------------------------------------------------------------------------------------------------------------------------------------------------------------------------------------------------------------------------------------------------------------------------------------|-----------------------------------------------------------------------------------------------------------------------------------------------------------------------------------------------------------------------------------------------------------------------|
| <b>Soziale Unterstützung</b> | Einbindung der Partner in Nachschulungen        | (+/-) Teilweise positive Evidenz bei Patienten mit Diabetes mellitus <ul style="list-style-type: none"> <li>Die Einbindung des Partners kann unter bestimmten Voraussetzungen (wie bspw. übereinstimmenden Erwartungen) zu signifikanten Verbesserungen des Selbstmanagements führen</li> </ul> | (!) Relevanter Eingriff in die Privatsphäre. Nicht für jede Partnerschaft geeignet<br>Ethische Voraussetzungen: <ul style="list-style-type: none"> <li>nur bei doppeltem Opt-in nach gründlicher Aufklärung</li> <li>Schulung des Partners für seine Rolle</li> </ul> |
|                              | Einbindung der Partner in Zielsetzungsgespräche |                                                                                                                                                                                                                                                                                                 |                                                                                                                                                                                                                                                                       |
|                              | Einbindung der Partner in Sprechstunden         |                                                                                                                                                                                                                                                                                                 |                                                                                                                                                                                                                                                                       |
|                              | Zusendung von Feedbackreporten an Partner       |                                                                                                                                                                                                                                                                                                 |                                                                                                                                                                                                                                                                       |

**Einordnung der Hinweise zur Wirksamkeit**

- (+) Überwiegend positive Evidenz
- (+/-) Teilweise positive Evidenz
- (?) Limitierte Evidenz

**Einordnung der ethischen Aspekte**

- (+) Ethisch weitgehend unbedenklich
- (!) Ethisch voraussetzungsreich aufgrund eines signifikanten Schadenspotenzials
- (-) Ethisch problematisch
